# Supplementary material for: Alteration in Intracellular Zn2+ Homeostasis as a Result of TRPM2 Channel Activation Contributes to ROS-Induced Hippocampal Neuronal Death
Source: PubMed Central journal article supplement (PMC5732979; doi:10.3389/fnmol.2017.00414), 2017-12-12

## Supplementary data by Xin Li et al

**Figure 1 H<sub>2</sub>O<sub>2</sub>-induced concentration- and duration-dependent hippocampal neuronal death.** Representative fluorescence images showing PI and Hoechst staining of WT neurons under control (CTL) or treatment with 30-300  $\mu$ M H<sub>2</sub>O<sub>2</sub> for 2, 8 and 24 hr. Scale bar is 100  $\mu$ m. The mean data are shown in Fig. 1a.

**Figure 2 Lack of an inhibition of PJ34 on H<sub>2</sub>O<sub>2</sub>-induced neuronal death in TRPM2-KO neurons.** Mean percentage of PI positive TRPM2-KO hippocampal neurons under control (CTL) or neurons exposed to 300  $\mu$ M H<sub>2</sub>O<sub>2</sub> for 24 hr or treated with 1  $\mu$ M PJ34, 30 min prior to and during exposure to 300  $\mu$ M H<sub>2</sub>O<sub>2</sub>, from 3 independent experiments with each independent experiment examining 450-600 neurons. \*\*\* p < 0.005 indicates difference from CTL. NS, no significant difference. The black bar shows H<sub>2</sub>O<sub>2</sub>-induced neuronal death in WT neurons as shown in Fig. 1c.

**Figure 3 No effect of PJ34 and 2-APB on the [Zn<sup>2+</sup>]<sub>c</sub> in H<sub>2</sub>O<sub>2</sub>-exposed TRPM2-KO neurons.** (a) Representative fluorescence images showing FluoZin3 fluorescence in TRPM2-KO hippocampal neurons under control (CTL) or exposed to 300  $\mu$ M H<sub>2</sub>O<sub>2</sub> for 30 min or treated with 1  $\mu$ M PJ34 or 10  $\mu$ M 2-APB, 30 min prior to and during exposure to H<sub>2</sub>O<sub>2</sub>. The scale bar is 10  $\mu$ m. (b) Mean FluoZin3 fluorescence intensity under indicated conditions from 3 independent experiments with a total of 40-60 neurons examined. All values are normalized to the basal fluorescence level in control neurons in matched experiments. NS, no significant difference.

**Figure 4 Effect of exposure to H<sub>2</sub>O<sub>2</sub> on TRPM2 protein expression.** Representative immunofluorescent images showing no increase in the TRPM2 expression in WT neurons under control (CTL) conditions or after exposure to 100  $\mu$ M or 300  $\mu$ M H<sub>2</sub>O<sub>2</sub> for 30 min. Similar observations were made in two independent experiments. Scale bar is 20  $\mu$ m.

# Supplementary Fig. 1

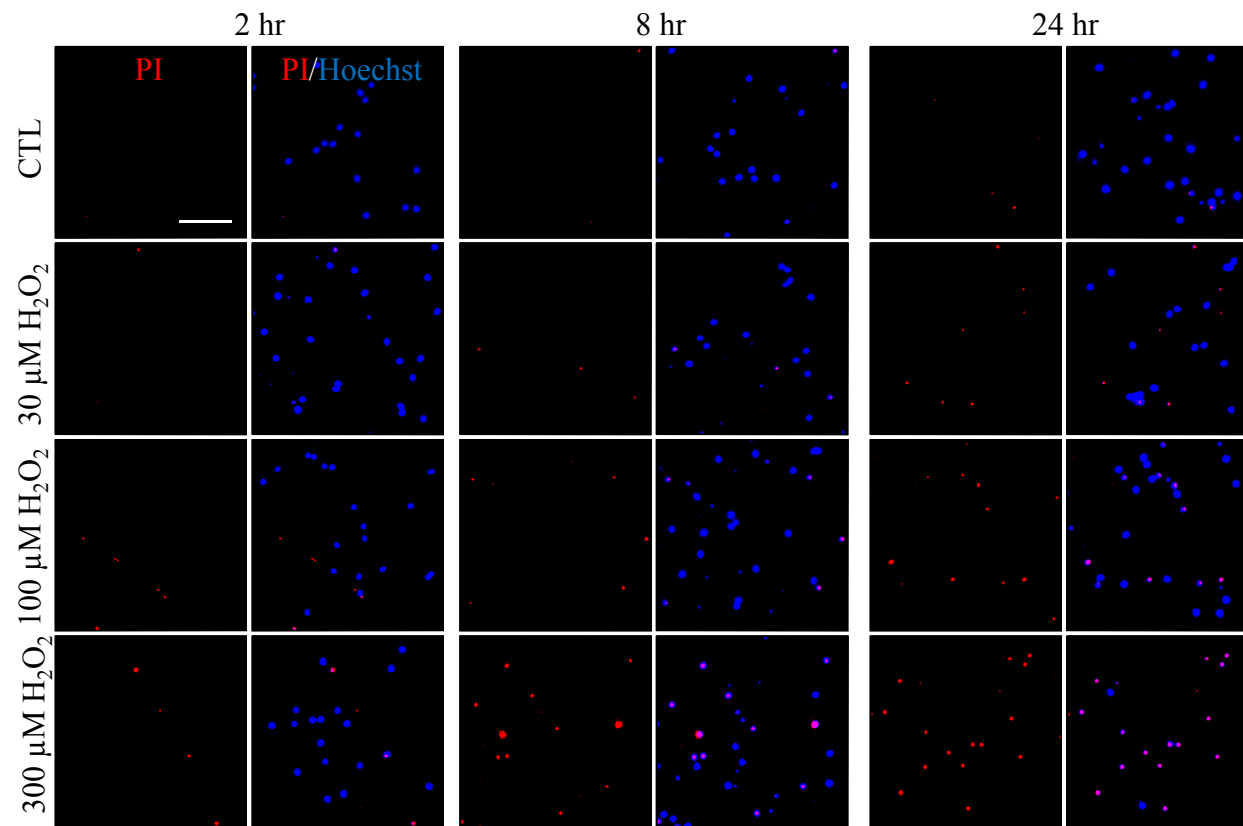

## Supplementary Fig. 2

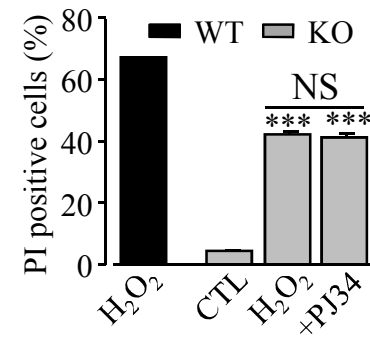

## Supplementary Fig. 3

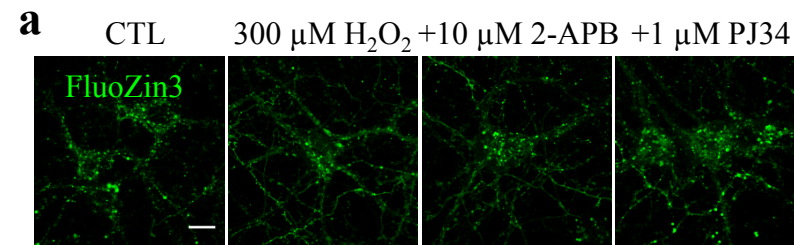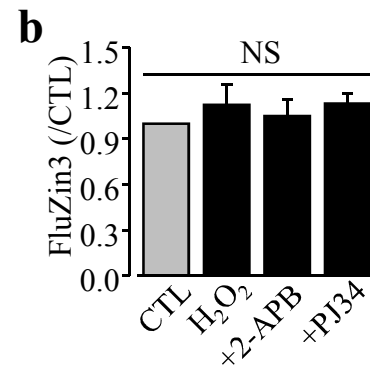

## Supplementary Fig. 4

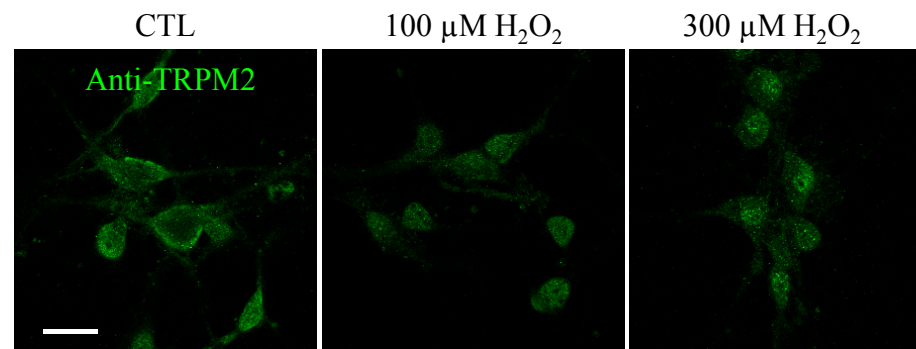

Supplement: Data_Sheet_1.pdf [file Data_Sheet_1.pdf]
